# Supplementary material for: Characterisation of faecal protease activity in irritable bowel syndrome with diarrhoea: origin and effect of gut transit
Source: PubMed Central journal article supplement — Gut. 2013 Aug 2;63(5):753–60. doi: 10.1136/gutjnl-2012-304042 (PMC3995279; doi:10.1136/gutjnl-2012-304042), 2013-08-02
Supplement: gutjnl-2012-304042-s1.pdf [file gutjnl-2012-304042-s1.pdf]

## Appendix Figure 1 Selectivity assessment of the employed Benzamidine-Sepharose affinity chromatography

Chromatogram (a) shows fractionation of components in a mixture of model proteins. SDS-PAGE (b) with subsequent component identification, using proteomic procedures, confirmed the selective retention of (the serine protease) bovine trypsinogen and the exclusion of horse myoglobin using the employed mobile phase buffer system.

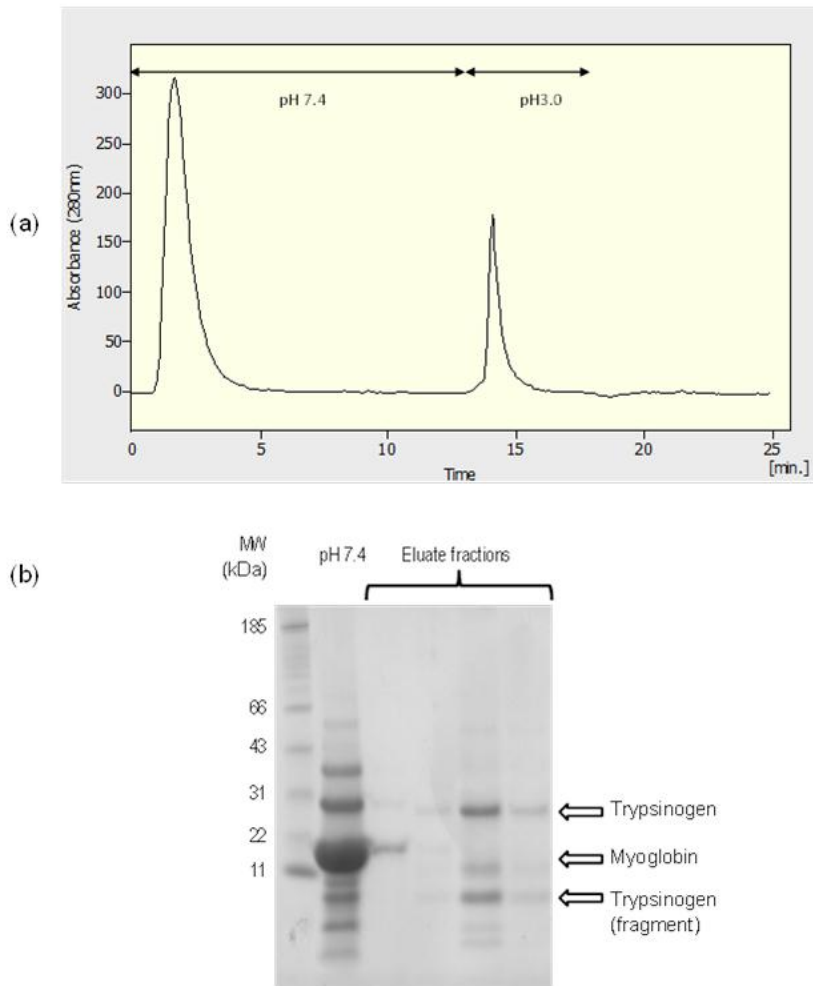

Appendix Figure 2  $\overline{FP}$  in trypsin units/mg protein in 36 IBS-D patients compared to 9 healthy controls showing wide variability in IBS-D values which were significantly greater than controls,  $p=0.038$

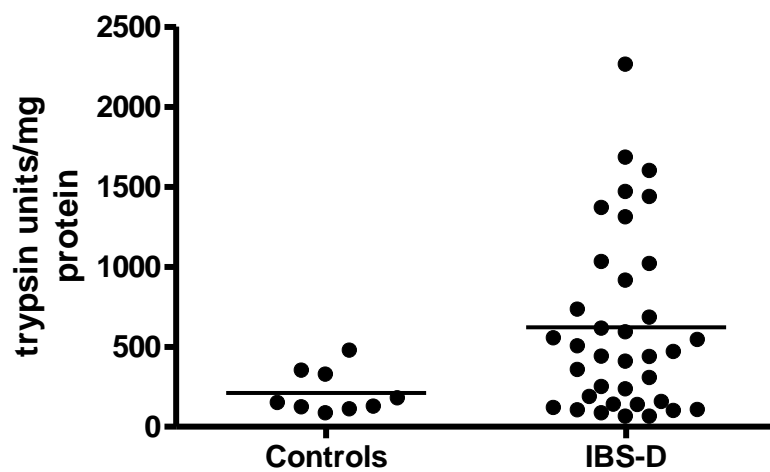

| Appendix Table 1 Comparison of included and excluded IBS-D patients |               |                         |                                        |                               |
|---------------------------------------------------------------------|---------------|-------------------------|----------------------------------------|-------------------------------|
|                                                                     | Gender<br>M/F | Age years<br>Mean (SEM) | Bowel<br>movements/day<br>Median (IQR) | Anxiety<br>HADS<br>Mean (SEM) |
| 79 with complete data                                               | 21/56         | 40.8(1.5)               | 2.3(1.2-3.4)                           | 10.0(0.6)                     |
| 49 excluded                                                         | 15/34         | 41.8(1.5)               | 2.6(1.8-4.1)                           | 10.0(0.3)                     |

### Legend to Table 1 appendix

There were no significant differences between the groups for any parameter.

Appendix Table 2: Summary of protein structure data determined from the proteomic analysis of Benzamidine-Sepharose enriched proteins, using tandem mass-spectrometry

| Name                              | Sequence coverage                                                                                                                                                                                                                                                                                                                                                                                                                                                                                                                                                                                                                                                                                                                                                                                                                                                                                                                                                                                                                                                          | Number of peptides | MOWSE score |
|-----------------------------------|----------------------------------------------------------------------------------------------------------------------------------------------------------------------------------------------------------------------------------------------------------------------------------------------------------------------------------------------------------------------------------------------------------------------------------------------------------------------------------------------------------------------------------------------------------------------------------------------------------------------------------------------------------------------------------------------------------------------------------------------------------------------------------------------------------------------------------------------------------------------------------------------------------------------------------------------------------------------------------------------------------------------------------------------------------------------------|--------------------|-------------|
| Human Pancreatic Alpha-amylase 2A | <p>1 MKFFLLFTI GFCWAQYSPN TQQGR<b>TSIVH LFEWRWVDIA LECERYLAPK</b></p> <p>51 <b>GFGGVQVSP</b> <b>NENVAIYNPF</b> <b>RPWWERYQP</b> <b>SYKLCTRSGN</b> <b>EDEF</b> <b>FRNMVTR</b></p> <p>101 <b>CNNVGVRIYV</b> <b>DAVINHMCGN</b> <b>AVSAGTSSTC</b> <b>GSYFNPGSRD</b> <b>FPAVPYSGWD</b></p> <p>151 <b>FNDGKCKTGS</b> <b>GDIENYNDAT</b> <b>QVRDCRLTGL</b> <b>LDLALEKDYV</b> <b>RSKIAEYMNH</b></p> <p>201 <b>LIDIGVAGFR</b> <b>LDASKHMWPG</b> <b>DIKAILDKLH</b> <b>NLNSNWF</b> <b>PAG SKPFIYQ</b> <b>EVI</b></p> <p>251 <b>DLGGEPIKSS</b> <b>DYFGNGRVTE</b> <b>FKYGAKLGT</b> <b>IRKWN</b> <b>GKMS YLKNW</b> <b>GEGWG</b></p> <p>301 <b>FVPSDRALVF</b> <b>VDNHDNQRGH</b> <b>GAGGASILTF</b> <b>WDARLYKMAV</b> <b>GFMLAHPYGF</b></p> <p>351 <b>TRVMSSYRWP</b> <b>RQFQNGNDVN</b> <b>DWVGPPNNG</b> <b>VIKEVTINPD</b> <b>TTCGNDWVCE</b></p> <p>401 <b>HRWRQIRNMV</b> <b>IFRNVDGQP</b> <b>FTNWDNGSN</b> <b>QVAFGRGNRG</b> <b>FIVFNDDWS</b></p> <p>451 <b>FSLTLQTGLP</b> <b>AGTYCDVISG</b> <b>DKINGNCTGI</b> <b>KIYVSDDGKA</b> <b>HFSISNSAED</b></p> <p>501 <b>PFI</b> <b>IHAESK</b> L</p> | 60                 | 2012        |

|                                  |                                                                                                                                                                                                                                                                                                                                                                                                                                                                                                                                                                                                                                                                                                                                                                                                                                                                 |    |      |
|----------------------------------|-----------------------------------------------------------------------------------------------------------------------------------------------------------------------------------------------------------------------------------------------------------------------------------------------------------------------------------------------------------------------------------------------------------------------------------------------------------------------------------------------------------------------------------------------------------------------------------------------------------------------------------------------------------------------------------------------------------------------------------------------------------------------------------------------------------------------------------------------------------------|----|------|
| Human Alpha-amylase 2B           | <p>1 MKFFLLLF<del>TI</del> GFCWAQYSPN TQQGR<del>TSIVH</del> LFEWRWVDIA LECERYLAPK</p> <p>51 GFGGVQVSPP NENVAIHNPF RPWWERYQPV SYKLCTRSGN EDEF<del>RNMVTR</del></p> <p>101 CNNVGVR<del>IYV</del> DAVINHMSGN AVSAGTSSTC GSYFNPGSRD FPAVPYSGWD</p> <p>151 FNDGKCKTGS GDIENYNDAT QVRDCRLVGL LDIALEKDYV RSKIAEYMNH</p> <p>201 LIDIGVAGFR LDASKHMWPG DIKA<del>ILDKLH</del> NLNSNWF<del>PAG</del> SKPFIYQ<del>EVI</del></p> <p>251 DLGGEPIKSS DYFGNGRVTE FKYGAKLGTV IRKWN<del>GEKMS</del> YLKNWGE<del>GWG</del></p> <p>301 FMPSDRALVF VDNHDNQRGH GAGGASILTF WDARLYKMAV GFMLAHPYGF</p> <p>351 TRVMSSYRWP RQFQNGNDVN DWVGPPN<del>NG</del> VIK<del>EVTINPD</del> TTCGNDW<del>VCE</del></p> <p>401 HRWRQIRNMV NFRNVVDGQP F<del>TNWDNGSN</del> QVAFGRGNRG FIVFN<del>DDWT</del></p> <p>451 FSLTLQTGLP AGTYCDVISG DKINGNCTGI KIYVSDDGKA HFSISNSAED</p> <p>501 PFIAIHAESK L</p> | 43 | 1636 |
| Human Trypsin-1 (Trypsinogen I)  | <p>1 MNPLLLILTFV AAALAAPFDD DDKIVGGYNC EENSVPYQVS LNSGYHFCGG</p> <p>51 SLINEQWVVS AGHCYKSRIQ VRLGEHNIEV LEGNEQFINA AKIIRHPQYD</p> <p>101 RKTLLNDIML IKLSSRAVIN ARVSTISLPT APPATG<del>TKCL</del> ISGWGNTASS</p> <p>151 GADYPDELQC LDAPVLSQAK CEASYPGKIT SNMFCVGFLE G<del>GKDSCQGDS</del></p> <p>201 GGPVVCNGQL QGVVSWGDC AQKNKPGVYT KVYNYVKWIK NTIAANS</p>                                                                                                                                                                                                                                                                                                                                                                                                                                                                                                       | 20 | 526  |
| Human Trypsin-2 (Trypsinogen II) | <p>1 MNLLLILTFV AAAVAAPFDD DDKIVGGYIC EENSVPYQVS LNSGYHFCGG</p> <p>51 SLISEQWVVS AGHCYKSRIQ VRLGEHNIEV LEGNEQFINA AKIIRHPKYN</p> <p>101 SR<del>TL</del>DNDILL IKLSSPAVIN SRVSAISLPT APPAAGTESL ISGWGNTLSS</p> <p>151 GADYPDELQC LDAPVLSQAE CEASYPGKIT NNMFCVGFLE G<del>GKDSCQGDS</del></p> <p>201 GGPVVSNGEL QGIVSWG<del>YGC</del> AQKNRPGVYT KVYNYVDWIK DTIAANS</p>                                                                                                                                                                                                                                                                                                                                                                                                                                                                                            | 24 | 617  |

|                                                            |                                                                                                                                                                                                                                                                                                                                                                                                                                                                                                                                                                                                                                |    |     |
|------------------------------------------------------------|--------------------------------------------------------------------------------------------------------------------------------------------------------------------------------------------------------------------------------------------------------------------------------------------------------------------------------------------------------------------------------------------------------------------------------------------------------------------------------------------------------------------------------------------------------------------------------------------------------------------------------|----|-----|
| Human Trypsin-3/4<br>(Trypsinogen III/IV)                  | <p>1 MCGPDDRCPA RWPGPRAVK CGKGLAARP GRVERGGAQR GGAGLELHPL</p> <p>51 LGGRTWRAAR DADGCEALGT VAVPFDDDDK IVGGYTCEEN SLPYQVSLNS</p> <p>101 GSHFCGGLI SEQWVSAAH CYKTRIQVRL <b>GEHNIKVLEG NEQFINAAKI</b></p> <p>151 IRHPKYNRDT LDNDIMLIKL SSPAVINARV STISLPTTPP AAGTECLISG</p> <p>201 WGNTLSFGAD YPDELKCLDA PVLTQAECKA SYPGKITNSM <b>FCVGFLEGGK</b></p> <p>251 DSCQRDSGGP VVCNGQLQGV VSWGHCAGWK <b>NRPGVYTKVY NYVDWIKDTI</b></p> <p>301 AANS</p>                                                                                                                                                                                      | 8  | 275 |
| Human<br>Chymotrypsin-like<br>elastase family<br>member 3B | <p>1 MMLRLLSSLL LVAVASGYGP PSSRPSSRVV <b>NGEDAVPYSW PWQVSLQYEK</b></p> <p>51 SSGSFYHTCGG SLIAPDWVVT AGHCISSRT YQVVLGEYDR AVKEGPEQVI</p> <p>101 PINSGLDFVH PLWNR<b>SCVAC GNDIALIKLS</b> RSAQLGDAVQ LASLPPAGDI</p> <p>151 LPNETPCYIT GWGR<b>LYTNGP LPDKLQEALL PVVDYEHCSR WNWGSSVKK</b></p> <p>201 <b>TMVCAGGDIR</b> SGCNGDSGGP LNCPTEDGGW QVHGVTSFVS AFGCNTRRK<b>P</b></p> <p>251 <b>TVFTRVSAFI DWIEETIASH</b></p>                                                                                                                                                                                                               | 13 | 393 |
| Human<br>Carboxypeptidase<br>B                             | <p>1 MLALLVLVTV ALASAHHGGE HFEGEKFRV NVEDENHINI IRELASTTQI</p> <p>51 DFWKPDVSTQ IKPHSTVDFR VKAEDTVTVE NVLKQNELQY KVLISNLRNV</p> <p>101 VEAQFDSRVR ATGHSYEKYN KWETIEAWTQ QVATENPALI SRSVIGTTFE</p> <p>151 GRAIYLLKVG KAGQNKPAIF MDCGFHAREW ISPAFCQWFV REAVRTYGRE</p> <p>201 IQVTELLDKL <b>DFYVLPVLNI DGYIYTWTKS</b> RFWRKTRSTH TGSSCIGTDP</p> <p>251 NRNFDAGWCE IGASRNPCDE TYCGPAAESE KET<b>KALADFI RNKLSSIKAY</b></p> <p>301 LTIHSYSQMM IYPYSYAYKL <b>GENNAELNAL AKATVKELAS LHGTKYTYGP</b></p> <p>351 GATTIYPAAG GSDDWAYDQG <b>IRYSFTFELR</b> DTGRYGFLLP <b>ESQIRATCEE</b></p> <p>401 TFLAIKY<b>VAS YVLEHLY</b></p>            | 5  | 155 |
| Human Alpha-1-<br>antitrypsin                              | <p>1 MPSSVSWGIL LLAGLCCCLVP VSLAEDPQGD AAQKTDTS HH DQDHPTFNKI</p> <p>51 TPNLAEFAFS LYRQLAHQSN STNIFFSPVS IATAFAMLSL GTKADTHDEI</p> <p>101 LEGLNFNLTE IPEAQIHEGF QELLR<b>TLNQP DSQQLTTGN GLFLSEGLKL</b></p> <p>151 VDKFLEDVKK LYHSEAFVFN FGDTEEAKKQ INDYVEKGTQ GKIVDLVK<b>EL</b></p> <p>201 <b>DRDITVFALVN YIFFK</b>GKWER PFEVKDTEEE DFHVDQVTTV KVPMMKRLGM</p> <p>251 FNIQHCKKLS SWVLLMKYLG NATAIFFLPD EGKLQHLENE LTHDII<b>TKFL</b></p> <p>301 ENEDRRSASL HLPK<b>LSITGT YDLKSVLQQL</b> GIT<b>KVFSNGA DLSGVTEEAP</b></p> <p>351 <b>LKLSKAVHKA VLTIDEKGTE</b> AAGAMFLEAI PMSIPPEVKF NKPFVFLMIE</p> <p>401 QNTKSPLFMG KVVNPTQK</p> | 5  | 173 |

Appendix Table 2 shows a summary of the proteomics results derived from Swiss-Prot database interrogated MASCOT search engine reports. Total precursor and product ion mass-spectrometry data derived from analyses of trypsinolytic peptides of components excised from SDS-PAGE gel profiles of Benzamidine-Sepharose enriched fractions of patient faeces extracts. The eight most abundant components are listed and the primary sequence detected is shown in bold red, together with the number of peptide identifications with statistically significant scores and the total molecular weight search engine (MOWSE) scores obtained for the components.



|            |      |
|------------|------|
| TRY1_HUMAN | AANS |
| TRY2_HUMAN | AANS |
| TRY3_HUMAN | AANS |
| TRYP_PIG   | AAN- |
|            | ***  |

Multiple sequence alignment (CLUSTAL Omega) of human trypsin sequences (TRY1-TRY3) and porcine trypsin (TRYP\_PIG). Asterisks indicate conserved residues in all sequences. Peptides identified by LC-MS/MS analysis of purified Benzamidine-Sepharose enriched components from faecal extracts are highlighted in red. Parent protein sequences from SWISS-PROT; data for TRYP\_PIG represents peptides derived from the sequencing grade trypsin used as part of the proteomic identification i.e. exogenous to the purified fractions. Unique peptide sequences exclusively found in only one of the trypsin sequences are underlined. Shaded residues denote tryptic cleavage sites. Note that none of the peptide sequences identified for TRYP\_PIG were common to the human sequences, and *vice versa*. Further, for each of the human trypsin sequences unique peptides could be identified.

## Appendix Figure 4:

Multiple sequence alignment of various human trypsin and tryptase sequences

```

TRY1_HUMAN      -----MNP
TRY2_HUMAN      -----MNL

TRY3_HUMAN      MCGPDDRCPARWPGGRAVKCGKGLAAARPGRVERGGAQRGGAGLELHPLLGGRTWRAAR

TRYB1_HUMAN     -----MLNLLL
TRYB2_HUMAN     -----MLLLAPQMLNLLL
TRYD_HUMAN      -----MLLLAPQMLSLLL

TRY1_HUMAN      LLILTFVAAALAAPFD---DDDKIVGGYNCEENSVPYQVSLNSG---YHFCGGSLINE
TRY2_HUMAN      LLILTFVAAAVAAPFD---DDDKIVGGYICEENSVPYQVSLNSG---YHFCGGSLISE
TRY3_HUMAN      DADGCEALGTVAVPFD---DDDKIVGGYTCEENSLPYQVSLNSG---SHFCGGSLISE
TRYB1_HUMAN     LALPVLASRAYAAPAPGQALQRVGI VGGQEAPRSKWPQVSLRVHGPYWMHFCCGGLIHP
TRYB2_HUMAN     LALPVLASRAYAAPAPGQALQRVGI VGGQEAPRSKWPQVSLRVHGPYWMHFCCGGLIHP
TRYD_HUMAN      LALPVLASPAYVAPAPGQALQQTGIVGGQEAPRSKWPQVSLRVHGPYWMHFCCGGLIHP

                . : ..*      :   **** . ... *:****.      *****

TRY1_HUMAN      QWVVSAGHCYKSRIQVRLG---EHNIEVLEGNEQFINAAK IIRHPQYDRKTLNNDIMLIK
TRY2_HUMAN      QWVVSAGHCYKSRIQVRLG---EHNIEVLEGNEQFINAAK IIRHPKYNSTRLDNDILLIK
TRY3_HUMAN      QWVVSAAHCYKTRIQVRLG---EHNIKVLEGNEQFINAAK IIRHPKYNRDTLDNDIMLIK
TRYB1_HUMAN     QWVLTAACHCVGPDVKDLAALRVQLREQHLYYQDQLLPVSRI IVHPQFYTAQIGADIALLE
TRYB2_HUMAN     QWVLTAACHCVGPDVKDLAALRVQLREQHLYYQDQLLPVSRI IVHPQFYTAQIGADIALLE
TRYD_HUMAN      QWVLTAACHVEFDIKDLAALRVQLREQHLYYQDQLLPVSRI IVHPQFYIIQTGADIALLE

                ***::*.** . :: . : . : * :*::: .:.* **:: . ** *::

TRY1_HUMAN      LSSRAVINARVSTISLPTAPP--ATGTKCLISGWGNTASSG-ADYPDELQCLDAPVLSQA
TRY2_HUMAN      LSSPAVINSRVS AISLPTAPP--AAGTESLISGWGNTLSSG-ADYPDELQCLDAPVLSQA
TRY3_HUMAN      LSSPAVINARVSTISLPTTPP--AAGTECLISGWGNTLSFG-ADYPDELKCLDAPVLTQA
TRYB1_HUMAN     LEEPVNVS SHVHTVTLPPASETFPPGMPCWVTGWGDVDNDERLPPPFPLKQVKVPIMENH
TRYB2_HUMAN     LEEPVKVSSHVHTVTLPPASETFPPGMPCWVTGWGDVDNDERLPPPFPLKQVKVPIMENH

```



```

TRYD_HUMAN      LEEPVNISSHIHTVTLPPASETFPPGMPWCWVTGWGDVDNNVHLPPPYPLKEVEVPVVENH
                  * . . . : : : : : : : * . . . . . * . . : : * * . . . * * : : . . * : : :
TRY1_HUMAN      KCEASYPG-----KITSNMFCVGFLEGGKDSQCQDSSGGPVCNGQ----LQGVVSW
TRY2_HUMAN      ECEASYPG-----KITNMFCVGFLEGGKDSQCQDSSGGPVVSNGE----LQGIVSW
TRY3_HUMAN      ECKASYPG-----KITNSMFCVGFLEGGKDSQCQDSSGGPVCNGQ----LQGVVSW
TRYB1_HUMAN     ICDAKYHLGAYTGDDVRIVRDDMLCAGNTR--RDSCQDSSGGPLVCKVNGTWLQAGVVS
TRYB2_HUMAN     ICDAKYHLGAYTGDDVRIVRDDMLCAGNTR--RDSCQDSSGGPLVCKVNGTWLQAGVVS
TRYD_HUMAN      LCNAEYHTGLHTGHSFQIVRDDMLCAGSEN--HDSCQDSSGGPLVCKVNGT-----
                  * . * . *           : . . * : * . * . : * * * * * * * * : * . : :
TRY1_HUMAN      GDGCAQKNKPGVYTKVYNYVKWIKNTIAANS
TRY2_HUMAN      GYGCAQKNRPGVYTKVYNYVDWIKDTIAANS
TRY3_HUMAN      GHGCAWKNRPGVYTKVYNYVDWIKDTIAANS
TRYB1_HUMAN     GEGCAQPNRPGIYTRVTYYLDWIHHYVPKKP
TRYB2_HUMAN     GEGCAQPNRPGIYTRVTYYLDWIHHYVPKKP
TRYD_HUMAN      -----

```

Multiple sequence alignment (CLUSTAL Omega) of human trypsin sequences (TRY1-TRY3) and human tryptases beta1, beta2 and delta (TRYB1\_HUMAN, TRYB2\_HUMAN and TRYD\_HUMAN). Asterisks indicate conserved residues in all sequences. Peptides identified by LC-MS/MS analysis of purified Benzamidine-Sepharose enriched components from faecal extracts are highlighted in red. Note that none of the peptide sequences identified for the human trypsin sequences are present in tryptase alpha/beta-1, tryptase beta-2 or tryptase delta.
